# Supplementary material for: Efficacy and safety of allogenic canine adipose tissue-derived mesenchymal stem cell therapy for insulin-dependent diabetes mellitus in four dogs: A pilot study
Source: PubMed Central journal article supplement — J Vet Med Sci. 2021 Feb 8;83(4):592–600. doi: 10.1292/jvms.20-0195 (PMC8111340; doi:10.1292/jvms.20-0195), 2021-02-08
Supplement: jvms-83-592_s001.pdf [file jvms-83-592_s001.pdf]

**A**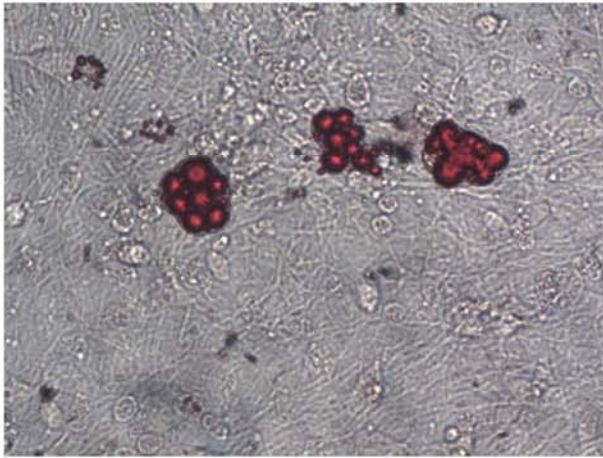**B**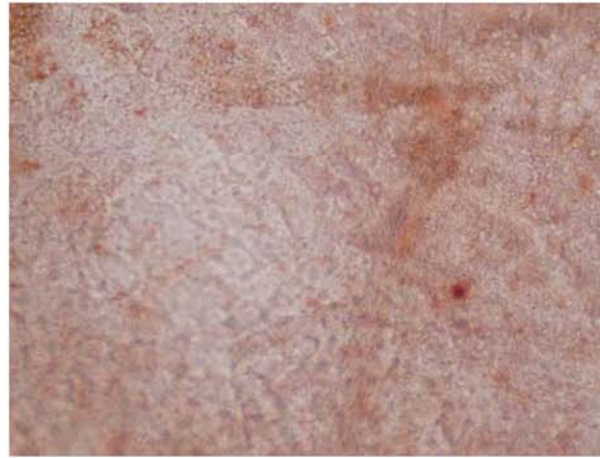**C**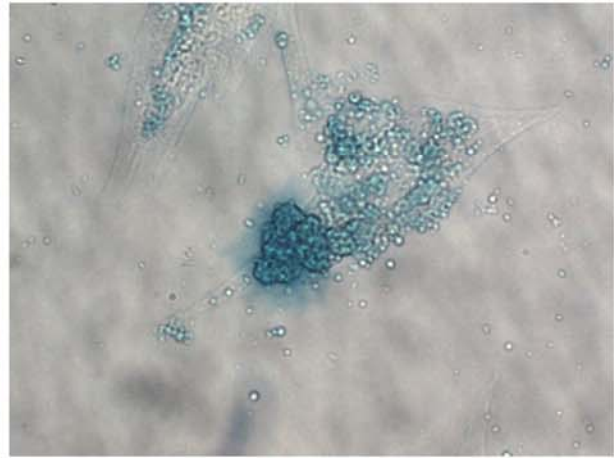**D**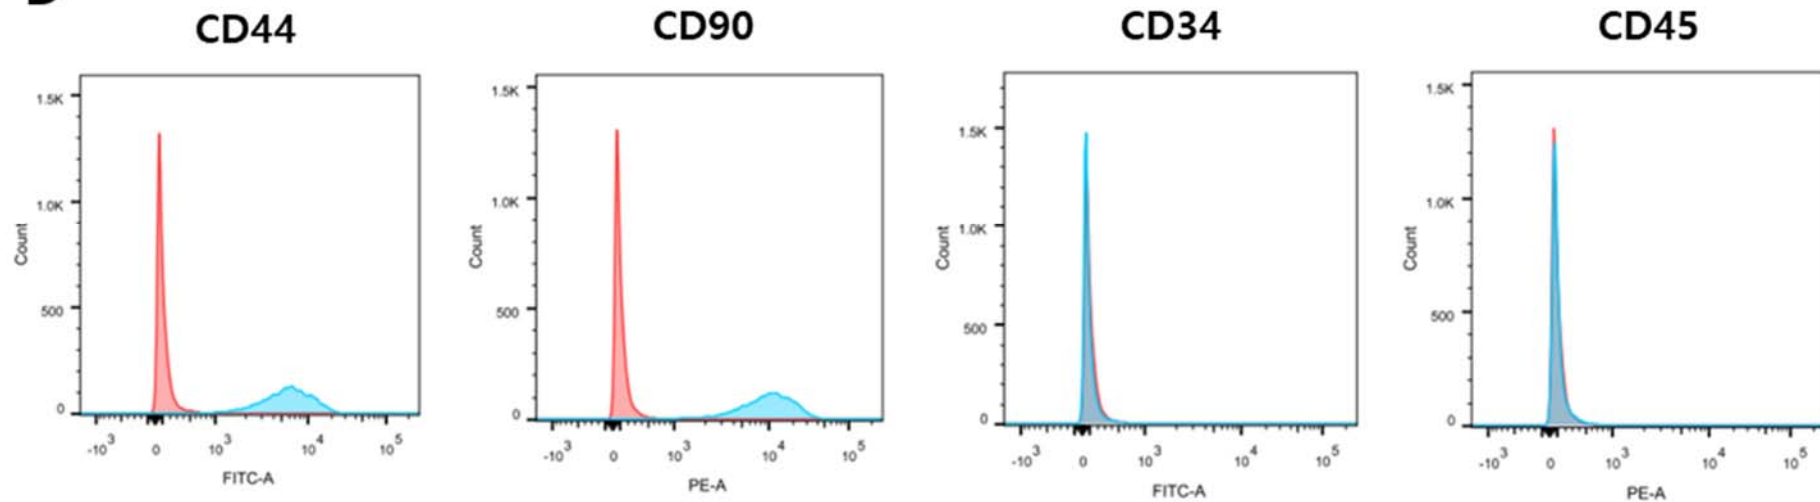

**Supplementary figure S1. Characterization of cAT-MSCs.** (A-C) Differentiation abilities of cAT-MSCs. A: Adipocytes stained with Oil Red O. B: Osteocytes stained with Alizarin Red. C: Chondrocytes stained with Alcian Blue. (D) Flow cytometric analysis of cAT-MSCs.
